# Supplementary material for: Toward fault tolerant modelling for SCADA based electricity distribution networks, machine learning approach
Source: PeerJ Comput Sci. 2021 May 26;7:e554. doi: 10.7717/peerj-cs.554 (PMC8176527; doi:10.7717/peerj-cs.554)
Supplement: Supplemental Information 4 [file peerj-cs-07-554-s004.xls]

## Sheet: Sheet1
194.165	44.2305	43.4271	20
176.599	15.6108	2.08856	19
176.27	62.0274	54.916	18
155.273	34.6838	11.6049	17
114.243	50.0759	60.6432	16
108.055	18.1888	31.218	15
103.027	20.1185	61.0823	14
101.229	0.204183	48.0528	13
90.3096	19.8594	35.7278	12
90.2777	9.49513	20.5867	11
84.0984	42.0734	25.3672	10
72.2511	13.9775	13.35	9
71.0117	25.8159	11.608	8
69.3354	30.3694	54.504	7
66.289	32.6033	38.0959	6
60.9208	2.83941	65.1668	5
59.1906	40.5675	72.5078	4
40.5674	48.5821	17.7701	3
8.989	3.47837	8.35594	2
0.729622	17.0627	74.3927	1
198.372	59.3208	31.4796	20
191.681	25.8626	0.724793	19
186.777	56.6143	1.06316	18
174.302	49.4888	54.935	17
169.078	60.5398	65.0344	16
156.228	37.172	53.2013	15
145.555	3.55921	14.4306	14
129.723	63.6552	42.1387	13
118.366	26.4139	44.4733	12
117.87	35.7328	12.766	11
110.521	45.7202	43.6728	10
102.973	18.3713	58.8611	9
86.2511	9.05824	21.2689	8
85.9206	52.8039	1.27234	7
70.954	30.925	59.1297	6
54.7975	34.0251	3.11678	5
31.5658	35.9847	50.1465	4
18.8566	32.495	13.4675	3
11.2248	33.7757	51.3397	2
4.45638	39.2687	72.531	1
199.931	48.0747	59.6263	20
197.193	52.2599	25.6582	19
193.367	26.6591	35.9721	18
188.98	51.2537	55.8211	17
188.228	21.109	45.254	16
188.049	10.1305	61.7072	15
159.865	25.2312	57.0743	14
154.27	61.0398	53.8222	13
136.554	6.32177	18.0399	12
113.49	12.3471	37.2281	11
113.05	55.8949	7.6635	10
112.67	50.9295	9.6443	9
112.389	9.8847	15.6623	8
81.7462	25.6521	26.1387	7
72.2877	56.8361	13.8955	6
60.174	53.4568	65.3454	5
56.6935	31.0269	58.8005	4
54.0382	14.1539	41.2261	3
45.0389	34.2231	35.0321	2
40.5897	57.183	67.5397	1
184.137	17.9594	29.0791	20
183.439	21.887	9.35416	19
180.685	45.2274	2.4857	18
175.638	50.5957	41.0662	17
175.16	60.2917	11.9003	16
170	8.20762	73.163	15
136.795	28.5692	60.8395	14
134.913	48.9662	40.872	13
129.528	9.2403	3.52567	12
125.597	33.1346	41.1443	11
119.086	3.45974	41.0427	10
115.938	15.432	60.8859	9
92.432	27.9209	10.4215	8
81.2533	38.059	65.6003	7
63.3228	26.9562	15.7997	6
53.0863	50.9542	3.40069	5
50.6144	53.4481	6.96412	4
44.2034	2.73026	51.9974	3
34.3134	11.0049	21.3869	2
7.53605	63.2967	11.9162	1
194.165	44.2305	43.4271	20
176.599	15.6108	2.08856	19
176.27	62.0274	54.916	18
155.273	34.6838	11.6049	17
114.243	50.0759	60.6432	16
108.055	18.1888	31.218	15
103.027	20.1185	61.0823	14
101.229	0.204183	48.0528	13
90.3096	19.8594	35.7278	12
90.2777	9.49513	20.5867	11
84.0984	42.0734	25.3672	10
72.2511	13.9775	13.35	9
71.0117	25.8159	11.608	8
69.3354	30.3694	54.504	7
66.289	32.6033	38.0959	6
60.9208	2.83941	65.1668	5
59.1906	40.5675	72.5078	4
40.5674	48.5821	17.7701	3
8.989	3.47837	8.35594	2
0.729622	17.0627	74.3927	1
198.372	59.3208	31.4796	20
191.681	25.8626	0.724793	19
186.777	56.6143	1.06316	18
174.302	49.4888	54.935	17
169.078	60.5398	65.0344	16
156.228	37.172	53.2013	15
145.555	3.55921	14.4306	14
129.723	63.6552	42.1387	13
118.366	26.4139	44.4733	12
117.87	35.7328	12.766	11
110.521	45.7202	43.6728	10
102.973	18.3713	58.8611	9
86.2511	9.05824	21.2689	8
85.9206	52.8039	1.27234	7
70.954	30.925	59.1297	6
54.7975	34.0251	3.11678	5
31.5658	35.9847	50.1465	4
18.8566	32.495	13.4675	3
11.2248	33.7757	51.3397	2
4.45638	39.2687	72.531	1
199.931	48.0747	59.6263	20
197.193	52.2599	25.6582	19
193.367	26.6591	35.9721	18
188.98	51.2537	55.8211	17
188.228	21.109	45.254	16
188.049	10.1305	61.7072	15
159.865	25.2312	57.0743	14
154.27	61.0398	53.8222	13
136.554	6.32177	18.0399	12
113.49	12.3471	37.2281	11
113.05	55.8949	7.6635	10
112.67	50.9295	9.6443	9
112.389	9.8847	15.6623	8
81.7462	25.6521	26.1387	7
72.2877	56.8361	13.8955	6
60.174	53.4568	65.3454	5
56.6935	31.0269	58.8005	4
54.0382	14.1539	41.2261	3
45.0389	34.2231	35.0321	2
40.5897	57.183	67.5397	1
184.137	17.9594	29.0791	20
183.439	21.887	9.35416	19
180.685	45.2274	2.4857	18
175.638	50.5957	41.0662	17
175.16	60.2917	11.9003	16
170	8.20762	73.163	15
136.795	28.5692	60.8395	14
134.913	48.9662	40.872	13
129.528	9.2403	3.52567	12
125.597	33.1346	41.1443	11
119.086	3.45974	41.0427	10
115.938	15.432	60.8859	9
92.432	27.9209	10.4215	8
81.2533	38.059	65.6003	7
63.3228	26.9562	15.7997	6
53.0863	50.9542	3.40069	5
50.6144	53.4481	6.96412	4
44.2034	2.73026	51.9974	3
34.3134	11.0049	21.3869	2
7.53605	63.2967	11.9162	1
194.165	44.2305	43.4271	20
176.599	15.6108	2.08856	19
176.27	62.0274	54.916	18
155.273	34.6838	11.6049	17
114.243	50.0759	60.6432	16
108.055	18.1888	31.218	15
103.027	20.1185	61.0823	14
101.229	0.204183	48.0528	13
90.3096	19.8594	35.7278	12
90.2777	9.49513	20.5867	11
84.0984	42.0734	25.3672	10
72.2511	13.9775	13.35	9
71.0117	25.8159	11.608	8
69.3354	30.3694	54.504	7
66.289	32.6033	38.0959	6
60.9208	2.83941	65.1668	5
59.1906	40.5675	72.5078	4
40.5674	48.5821	17.7701	3
8.989	3.47837	8.35594	2
0.729622	17.0627	74.3927	1
198.372	59.3208	31.4796	20
191.681	25.8626	0.724793	19
186.777	56.6143	1.06316	18
174.302	49.4888	54.935	17
169.078	60.5398	65.0344	16
156.228	37.172	53.2013	15
145.555	3.55921	14.4306	14
129.723	63.6552	42.1387	13
118.366	26.4139	44.4733	12
117.87	35.7328	12.766	11
110.521	45.7202	43.6728	10
102.973	18.3713	58.8611	9
86.2511	9.05824	21.2689	8
85.9206	52.8039	1.27234	7
70.954	30.925	59.1297	6
54.7975	34.0251	3.11678	5
31.5658	35.9847	50.1465	4
18.8566	32.495	13.4675	3
11.2248	33.7757	51.3397	2
4.45638	39.2687	72.531	1
199.931	48.0747	59.6263	20
197.193	52.2599	25.6582	19
193.367	26.6591	35.9721	18
188.98	51.2537	55.8211	17
188.228	21.109	45.254	16
188.049	10.1305	61.7072	15
159.865	25.2312	57.0743	14
154.27	61.0398	53.8222	13
136.554	6.32177	18.0399	12
113.49	12.3471	37.2281	11
113.05	55.8949	7.6635	10
112.67	50.9295	9.6443	9
112.389	9.8847	15.6623	8
81.7462	25.6521	26.1387	7
72.2877	56.8361	13.8955	6
60.174	53.4568	65.3454	5
56.6935	31.0269	58.8005	4
54.0382	14.1539	41.2261	3
45.0389	34.2231	35.0321	2
40.5897	57.183	67.5397	1
184.137	17.9594	29.0791	20
183.439	21.887	9.35416	19
180.685	45.2274	2.4857	18
175.638	50.5957	41.0662	17
175.16	60.2917	11.9003	16
170	8.20762	73.163	15
136.795	28.5692	60.8395	14
134.913	48.9662	40.872	13
129.528	9.2403	3.52567	12
125.597	33.1346	41.1443	11
119.086	3.45974	41.0427	10
115.938	15.432	60.8859	9
92.432	27.9209	10.4215	8
81.2533	38.059	65.6003	7
63.3228	26.9562	15.7997	6
53.0863	50.9542	3.40069	5
50.6144	53.4481	6.96412	4
44.2034	2.73026	51.9974	3
34.3134	11.0049	21.3869	2
7.53605	63.2967	11.9162	1
194.165	44.2305	43.4271	20
176.599	15.6108	2.08856	19
176.27	62.0274	54.916	18
155.273	34.6838	11.6049	17
114.243	50.0759	60.6432	16
108.055	18.1888	31.218	15
103.027	20.1185	61.0823	14
101.229	0.204183	48.0528	13
90.3096	19.8594	35.7278	12
90.2777	9.49513	20.5867	11
84.0984	42.0734	25.3672	10
72.2511	13.9775	13.35	9
71.0117	25.8159	11.608	8
69.3354	30.3694	54.504	7
66.289	32.6033	38.0959	6
60.9208	2.83941	65.1668	5
59.1906	40.5675	72.5078	4
40.5674	48.5821	17.7701	3
8.989	3.47837	8.35594	2
0.729622	17.0627	74.3927	1
198.372	59.3208	31.4796	20
191.681	25.8626	0.724793	19
186.777	56.6143	1.06316	18
174.302	49.4888	54.935	17
169.078	60.5398	65.0344	16
156.228	37.172	53.2013	15
145.555	3.55921	14.4306	14
129.723	63.6552	42.1387	13
118.366	26.4139	44.4733	12
117.87	35.7328	12.766	11
110.521	45.7202	43.6728	10
102.973	18.3713	58.8611	9
86.2511	9.05824	21.2689	8
85.9206	52.8039	1.27234	7
70.954	30.925	59.1297	6
54.7975	34.0251	3.11678	5
31.5658	35.9847	50.1465	4
18.8566	32.495	13.4675	3
11.2248	33.7757	51.3397	2
4.45638	39.2687	72.531	1
199.931	48.0747	59.6263	20
197.193	52.2599	25.6582	19
193.367	26.6591	35.9721	18
188.98	51.2537	55.8211	17
188.228	21.109	45.254	16
188.049	10.1305	61.7072	15
159.865	25.2312	57.0743	14
154.27	61.0398	53.8222	13
136.554	6.32177	18.0399	12
113.49	12.3471	37.2281	11
113.05	55.8949	7.6635	10
112.67	50.9295	9.6443	9
112.389	9.8847	15.6623	8
81.7462	25.6521	26.1387	7
72.2877	56.8361	13.8955	6
60.174	53.4568	65.3454	5
56.6935	31.0269	58.8005	4
54.0382	14.1539	41.2261	3
45.0389	34.2231	35.0321	2
40.5897	57.183	67.5397	1
184.137	17.9594	29.0791	20
183.439	21.887	9.35416	19
180.685	45.2274	2.4857	18
175.638	50.5957	41.0662	17
175.16	60.2917	11.9003	16
170	8.20762	73.163	15
136.795	28.5692	60.8395	14
134.913	48.9662	40.872	13
129.528	9.2403	3.52567	12
125.597	33.1346	41.1443	11
119.086	3.45974	41.0427	10
115.938	15.432	60.8859	9
92.432	27.9209	10.4215	8
81.2533	38.059	65.6003	7
63.3228	26.9562	15.7997	6
53.0863	50.9542	3.40069	5
50.6144	53.4481	6.96412	4
44.2034	2.73026	51.9974	3
34.3134	11.0049	21.3869	2
7.53605	63.2967	11.9162	1
194.165	44.2305	43.4271	20
176.599	15.6108	2.08856	19
176.27	62.0274	54.916	18
155.273	34.6838	11.6049	17
114.243	50.0759	60.6432	16
108.055	18.1888	31.218	15
103.027	20.1185	61.0823	14
101.229	0.204183	48.0528	13
90.3096	19.8594	35.7278	12
90.2777	9.49513	20.5867	11
84.0984	42.0734	25.3672	10
72.2511	13.9775	13.35	9
71.0117	25.8159	11.608	8
69.3354	30.3694	54.504	7
66.289	32.6033	38.0959	6
60.9208	2.83941	65.1668	5
59.1906	40.5675	72.5078	4
40.5674	48.5821	17.7701	3
8.989	3.47837	8.35594	2
0.729622	17.0627	74.3927	1
198.372	59.3208	31.4796	20
191.681	25.8626	0.724793	19
186.777	56.6143	1.06316	18
174.302	49.4888	54.935	17
169.078	60.5398	65.0344	16
156.228	37.172	53.2013	15
145.555	3.55921	14.4306	14
129.723	63.6552	42.1387	13
118.366	26.4139	44.4733	12
117.87	35.7328	12.766	11
110.521	45.7202	43.6728	10
102.973	18.3713	58.8611	9
86.2511	9.05824	21.2689	8
85.9206	52.8039	1.27234	7
70.954	30.925	59.1297	6
54.7975	34.0251	3.11678	5
31.5658	35.9847	50.1465	4
18.8566	32.495	13.4675	3
11.2248	33.7757	51.3397	2
4.45638	39.2687	72.531	1
199.931	48.0747	59.6263	20
197.193	52.2599	25.6582	19
193.367	26.6591	35.9721	18
188.98	51.2537	55.8211	17
188.228	21.109	45.254	16
188.049	10.1305	61.7072	15
159.865	25.2312	57.0743	14
154.27	61.0398	53.8222	13
136.554	6.32177	18.0399	12
113.49	12.3471	37.2281	11
113.05	55.8949	7.6635	10
112.67	50.9295	9.6443	9
112.389	9.8847	15.6623	8
81.7462	25.6521	26.1387	7
72.2877	56.8361	13.8955	6
60.174	53.4568	65.3454	5
56.6935	31.0269	58.8005	4
54.0382	14.1539	41.2261	3
45.0389	34.2231	35.0321	2
40.5897	57.183	67.5397	1
184.137	17.9594	29.0791	20
183.439	21.887	9.35416	19
180.685	45.2274	2.4857	18
175.638	50.5957	41.0662	17
175.16	60.2917	11.9003	16
170	8.20762	73.163	15
136.795	28.5692	60.8395	14
134.913	48.9662	40.872	13
129.528	9.2403	3.52567	12
125.597	33.1346	41.1443	11
119.086	3.45974	41.0427	10
115.938	15.432	60.8859	9
92.432	27.9209	10.4215	8
81.2533	38.059	65.6003	7
63.3228	26.9562	15.7997	6
53.0863	50.9542	3.40069	5
50.6144	53.4481	6.96412	4
44.2034	2.73026	51.9974	3
34.3134	11.0049	21.3869	2
7.53605	63.2967	11.9162	1
194.165	44.2305	43.4271	20
176.599	15.6108	2.08856	19
176.27	62.0274	54.916	18
155.273	34.6838	11.6049	17
114.243	50.0759	60.6432	16
108.055	18.1888	31.218	15
103.027	20.1185	61.0823	14
101.229	0.204183	48.0528	13
90.3096	19.8594	35.7278	12
90.2777	9.49513	20.5867	11
84.0984	42.0734	25.3672	10
72.2511	13.9775	13.35	9
71.0117	25.8159	11.608	8
69.3354	30.3694	54.504	7
66.289	32.6033	38.0959	6
60.9208	2.83941	65.1668	5
59.1906	40.5675	72.5078	4
40.5674	48.5821	17.7701	3
8.989	3.47837	8.35594	2
0.729622	17.0627	74.3927	1
198.372	59.3208	31.4796	20
191.681	25.8626	0.724793	19
186.777	56.6143	1.06316	18
174.302	49.4888	54.935	17
169.078	60.5398	65.0344	16
156.228	37.172	53.2013	15
145.555	3.55921	14.4306	14
129.723	63.6552	42.1387	13
118.366	26.4139	44.4733	12
117.87	35.7328	12.766	11
110.521	45.7202	43.6728	10
102.973	18.3713	58.8611	9
86.2511	9.05824	21.2689	8
85.9206	52.8039	1.27234	7
70.954	30.925	59.1297	6
54.7975	34.0251	3.11678	5
31.5658	35.9847	50.1465	4
18.8566	32.495	13.4675	3
11.2248	33.7757	51.3397	2
4.45638	39.2687	72.531	1
199.931	48.0747	59.6263	20
197.193	52.2599	25.6582	19
193.367	26.6591	35.9721	18
188.98	51.2537	55.8211	17
188.228	21.109	45.254	16
188.049	10.1305	61.7072	15
159.865	25.2312	57.0743	14
154.27	61.0398	53.8222	13
136.554	6.32177	18.0399	12
113.49	12.3471	37.2281	11
113.05	55.8949	7.6635	10
112.67	50.9295	9.6443	9
112.389	9.8847	15.6623	8
81.7462	25.6521	26.1387	7
72.2877	56.8361	13.8955	6
60.174	53.4568	65.3454	5
56.6935	31.0269	58.8005	4
54.0382	14.1539	41.2261	3
45.0389	34.2231	35.0321	2
40.5897	57.183	67.5397	1
184.137	17.9594	29.0791	20
183.439	21.887	9.35416	19
180.685	45.2274	2.4857	18
175.638	50.5957	41.0662	17
175.16	60.2917	11.9003	16
170	8.20762	73.163	15
136.795	28.5692	60.8395	14
134.913	48.9662	40.872	13
129.528	9.2403	3.52567	12
125.597	33.1346	41.1443	11
119.086	3.45974	41.0427	10
115.938	15.432	60.8859	9
92.432	27.9209	10.4215	8
81.2533	38.059	65.6003	7
63.3228	26.9562	15.7997	6
53.0863	50.9542	3.40069	5
50.6144	53.4481	6.96412	4
44.2034	2.73026	51.9974	3
34.3134	11.0049	21.3869	2
7.53605	63.2967	11.9162	1
194.165	44.2305	43.4271	20
176.599	15.6108	2.08856	19
176.27	62.0274	54.916	18
155.273	34.6838	11.6049	17
114.243	50.0759	60.6432	16
108.055	18.1888	31.218	15
103.027	20.1185	61.0823	14
101.229	0.204183	48.0528	13
90.3096	19.8594	35.7278	12
90.2777	9.49513	20.5867	11
84.0984	42.0734	25.3672	10
72.2511	13.9775	13.35	9
71.0117	25.8159	11.608	8
69.3354	30.3694	54.504	7
66.289	32.6033	38.0959	6
60.9208	2.83941	65.1668	5
59.1906	40.5675	72.5078	4
40.5674	48.5821	17.7701	3
8.989	3.47837	8.35594	2
0.729622	17.0627	74.3927	1
198.372	59.3208	31.4796	20
191.681	25.8626	0.724793	19
186.777	56.6143	1.06316	18
174.302	49.4888	54.935	17
169.078	60.5398	65.0344	16
156.228	37.172	53.2013	15
145.555	3.55921	14.4306	14
129.723	63.6552	42.1387	13
118.366	26.4139	44.4733	12
117.87	35.7328	12.766	11
110.521	45.7202	43.6728	10
102.973	18.3713	58.8611	9
86.2511	9.05824	21.2689	8
85.9206	52.8039	1.27234	7
70.954	30.925	59.1297	6
54.7975	34.0251	3.11678	5
31.5658	35.9847	50.1465	4
18.8566	32.495	13.4675	3
11.2248	33.7757	51.3397	2
4.45638	39.2687	72.531	1
199.931	48.0747	59.6263	20
197.193	52.2599	25.6582	19
193.367	26.6591	35.9721	18
188.98	51.2537	55.8211	17
188.228	21.109	45.254	16
188.049	10.1305	61.7072	15
159.865	25.2312	57.0743	14
154.27	61.0398	53.8222	13
136.554	6.32177	18.0399	12
113.49	12.3471	37.2281	11
113.05	55.8949	7.6635	10
112.67	50.9295	9.6443	9
112.389	9.8847	15.6623	8
81.7462	25.6521	26.1387	7
72.2877	56.8361	13.8955	6
60.174	53.4568	65.3454	5
56.6935	31.0269	58.8005	4
54.0382	14.1539	41.2261	3
45.0389	34.2231	35.0321	2
40.5897	57.183	67.5397	1
184.137	17.9594	29.0791	20
183.439	21.887	9.35416	19
180.685	45.2274	2.4857	18
175.638	50.5957	41.0662	17
175.16	60.2917	11.9003	16
170	8.20762	73.163	15
136.795	28.5692	60.8395	14
134.913	48.9662	40.872	13
129.528	9.2403	3.52567	12
125.597	33.1346	41.1443	11
119.086	3.45974	41.0427	10
115.938	15.432	60.8859	9
92.432	27.9209	10.4215	8
81.2533	38.059	65.6003	7
63.3228	26.9562	15.7997	6
53.0863	50.9542	3.40069	5
50.6144	53.4481	6.96412	4
44.2034	2.73026	51.9974	3
34.3134	11.0049	21.3869	2
7.53605	63.2967	11.9162	1
194.165	44.2305	43.4271	20
176.599	15.6108	2.08856	19
176.27	62.0274	54.916	18
155.273	34.6838	11.6049	17
114.243	50.0759	60.6432	16
108.055	18.1888	31.218	15
103.027	20.1185	61.0823	14
101.229	0.204183	48.0528	13
90.3096	19.8594	35.7278	12
90.2777	9.49513	20.5867	11
84.0984	42.0734	25.3672	10
72.2511	13.9775	13.35	9
71.0117	25.8159	11.608	8
69.3354	30.3694	54.504	7
66.289	32.6033	38.0959	6
60.9208	2.83941	65.1668	5
59.1906	40.5675	72.5078	4
40.5674	48.5821	17.7701	3
8.989	3.47837	8.35594	2
0.729622	17.0627	74.3927	1
198.372	59.3208	31.4796	20
191.681	25.8626	0.724793	19
186.777	56.6143	1.06316	18
174.302	49.4888	54.935	17
169.078	60.5398	65.0344	16
156.228	37.172	53.2013	15
145.555	3.55921	14.4306	14
129.723	63.6552	42.1387	13
118.366	26.4139	44.4733	12
117.87	35.7328	12.766	11
110.521	45.7202	43.6728	10
102.973	18.3713	58.8611	9
86.2511	9.05824	21.2689	8
85.9206	52.8039	1.27234	7
70.954	30.925	59.1297	6
54.7975	34.0251	3.11678	5
31.5658	35.9847	50.1465	4
18.8566	32.495	13.4675	3
11.2248	33.7757	51.3397	2
4.45638	39.2687	72.531	1
199.931	48.0747	59.6263	20
197.193	52.2599	25.6582	19
193.367	26.6591	35.9721	18
188.98	51.2537	55.8211	17
188.228	21.109	45.254	16
188.049	10.1305	61.7072	15
159.865	25.2312	57.0743	14
154.27	61.0398	53.8222	13
136.554	6.32177	18.0399	12
113.49	12.3471	37.2281	11
113.05	55.8949	7.6635	10
112.67	50.9295	9.6443	9
112.389	9.8847	15.6623	8
81.7462	25.6521	26.1387	7
72.2877	56.8361	13.8955	6
60.174	53.4568	65.3454	5
56.6935	31.0269	58.8005	4
54.0382	14.1539	41.2261	3
45.0389	34.2231	35.0321	2
40.5897	57.183	67.5397	1
184.137	17.9594	29.0791	20
183.439	21.887	9.35416	19
180.685	45.2274	2.4857	18
175.638	50.5957	41.0662	17
175.16	60.2917	11.9003	16
170	8.20762	73.163	15
136.795	28.5692	60.8395	14
134.913	48.9662	40.872	13
129.528	9.2403	3.52567	12
125.597	33.1346	41.1443	11
119.086	3.45974	41.0427	10
115.938	15.432	60.8859	9
92.432	27.9209	10.4215	8
81.2533	38.059	65.6003	7
63.3228	26.9562	15.7997	6
53.0863	50.9542	3.40069	5
50.6144	53.4481	6.96412	4
44.2034	2.73026	51.9974	3
34.3134	11.0049	21.3869	2
7.53605	63.2967	11.9162	1
194.165	44.2305	43.4271	20
176.599	15.6108	2.08856	19
176.27	62.0274	54.916	18
155.273	34.6838	11.6049	17
114.243	50.0759	60.6432	16
108.055	18.1888	31.218	15
103.027	20.1185	61.0823	14
101.229	0.204183	48.0528	13
90.3096	19.8594	35.7278	12
90.2777	9.49513	20.5867	11
84.0984	42.0734	25.3672	10
72.2511	13.9775	13.35	9
71.0117	25.8159	11.608	8
69.3354	30.3694	54.504	7
66.289	32.6033	38.0959	6
60.9208	2.83941	65.1668	5
59.1906	40.5675	72.5078	4
40.5674	48.5821	17.7701	3
8.989	3.47837	8.35594	2
0.729622	17.0627	74.3927	1
198.372	59.3208	31.4796	20
191.681	25.8626	0.724793	19
186.777	56.6143	1.06316	18
174.302	49.4888	54.935	17
169.078	60.5398	65.0344	16
156.228	37.172	53.2013	15
145.555	3.55921	14.4306	14
129.723	63.6552	42.1387	13
118.366	26.4139	44.4733	12
117.87	35.7328	12.766	11
110.521	45.7202	43.6728	10
102.973	18.3713	58.8611	9
86.2511	9.05824	21.2689	8
85.9206	52.8039	1.27234	7
70.954	30.925	59.1297	6
54.7975	34.0251	3.11678	5
31.5658	35.9847	50.1465	4
18.8566	32.495	13.4675	3
11.2248	33.7757	51.3397	2
4.45638	39.2687	72.531	1
199.931	48.0747	59.6263	20
197.193	52.2599	25.6582	19
193.367	26.6591	35.9721	18
188.98	51.2537	55.8211	17
188.228	21.109	45.254	16
188.049	10.1305	61.7072	15
159.865	25.2312	57.0743	14
154.27	61.0398	53.8222	13
136.554	6.32177	18.0399	12
113.49	12.3471	37.2281	11
113.05	55.8949	7.6635	10
112.67	50.9295	9.6443	9
112.389	9.8847	15.6623	8
81.7462	25.6521	26.1387	7
72.2877	56.8361	13.8955	6
60.174	53.4568	65.3454	5
56.6935	31.0269	58.8005	4
54.0382	14.1539	41.2261	3
45.0389	34.2231	35.0321	2
40.5897	57.183	67.5397	1
184.137	17.9594	29.0791	20
183.439	21.887	9.35416	19
180.685	45.2274	2.4857	18
175.638	50.5957	41.0662	17
175.16	60.2917	11.9003	16
170	8.20762	73.163	15
136.795	28.5692	60.8395	14
134.913	48.9662	40.872	13
129.528	9.2403	3.52567	12
125.597	33.1346	41.1443	11
119.086	3.45974	41.0427	10
115.938	15.432	60.8859	9
92.432	27.9209	10.4215	8
81.2533	38.059	65.6003	7
63.3228	26.9562	15.7997	6
53.0863	50.9542	3.40069	5
50.6144	53.4481	6.96412	4
44.2034	2.73026	51.9974	3
34.3134	11.0049	21.3869	2
7.53605	63.2967	11.9162	1
194.165	44.2305	43.4271	20
176.599	15.6108	2.08856	19
176.27	62.0274	54.916	18
155.273	34.6838	11.6049	17
114.243	50.0759	60.6432	16
108.055	18.1888	31.218	15
103.027	20.1185	61.0823	14
101.229	0.204183	48.0528	13
90.3096	19.8594	35.7278	12
90.2777	9.49513	20.5867	11
84.0984	42.0734	25.3672	10
72.2511	13.9775	13.35	9
71.0117	25.8159	11.608	8
69.3354	30.3694	54.504	7
66.289	32.6033	38.0959	6
60.9208	2.83941	65.1668	5
59.1906	40.5675	72.5078	4
40.5674	48.5821	17.7701	3
8.989	3.47837	8.35594	2
0.729622	17.0627	74.3927	1
198.372	59.3208	31.4796	20
191.681	25.8626	0.724793	19
186.777	56.6143	1.06316	18
174.302	49.4888	54.935	17
169.078	60.5398	65.0344	16
156.228	37.172	53.2013	15
145.555	3.55921	14.4306	14
129.723	63.6552	42.1387	13
118.366	26.4139	44.4733	12
117.87	35.7328	12.766	11
110.521	45.7202	43.6728	10
102.973	18.3713	58.8611	9
86.2511	9.05824	21.2689	8
85.9206	52.8039	1.27234	7
70.954	30.925	59.1297	6
54.7975	34.0251	3.11678	5
31.5658	35.9847	50.1465	4
18.8566	32.495	13.4675	3
11.2248	33.7757	51.3397	2
4.45638	39.2687	72.531	1
199.931	48.0747	59.6263	20
197.193	52.2599	25.6582	19
193.367	26.6591	35.9721	18
188.98	51.2537	55.8211	17
188.228	21.109	45.254	16
188.049	10.1305	61.7072	15
159.865	25.2312	57.0743	14
154.27	61.0398	53.8222	13
136.554	6.32177	18.0399	12
113.49	12.3471	37.2281	11
113.05	55.8949	7.6635	10
112.67	50.9295	9.6443	9
112.389	9.8847	15.6623	8
81.7462	25.6521	26.1387	7
72.2877	56.8361	13.8955	6
60.174	53.4568	65.3454	5
56.6935	31.0269	58.8005	4
54.0382	14.1539	41.2261	3
45.0389	34.2231	35.0321	2
40.5897	57.183	67.5397	1
184.137	17.9594	29.0791	20
183.439	21.887	9.35416	19
180.685	45.2274	2.4857	18
175.638	50.5957	41.0662	17
175.16	60.2917	11.9003	16
170	8.20762	73.163	15
136.795	28.5692	60.8395	14
134.913	48.9662	40.872	13
129.528	9.2403	3.52567	12
125.597	33.1346	41.1443	11
119.086	3.45974	41.0427	10
115.938	15.432	60.8859	9
92.432	27.9209	10.4215	8
81.2533	38.059	65.6003	7
63.3228	26.9562	15.7997	6
53.0863	50.9542	3.40069	5
50.6144	53.4481	6.96412	4
44.2034	2.73026	51.9974	3
34.3134	11.0049	21.3869	2
7.53605	63.2967	11.9162	1
194.165	44.2305	43.4271	20
176.599	15.6108	2.08856	19
176.27	62.0274	54.916	18
155.273	34.6838	11.6049	17
114.243	50.0759	60.6432	16
108.055	18.1888	31.218	15
103.027	20.1185	61.0823	14
101.229	0.204183	48.0528	13
90.3096	19.8594	35.7278	12
90.2777	9.49513	20.5867	11
84.0984	42.0734	25.3672	10
72.2511	13.9775	13.35	9
71.0117	25.8159	11.608	8
69.3354	30.3694	54.504	7
66.289	32.6033	38.0959	6
60.9208	2.83941	65.1668	5
59.1906	40.5675	72.5078	4
40.5674	48.5821	17.7701	3
8.989	3.47837	8.35594	2
0.729622	17.0627	74.3927	1
198.372	59.3208	31.4796	20
191.681	25.8626	0.724793	19
186.777	56.6143	1.06316	18
174.302	49.4888	54.935	17
169.078	60.5398	65.0344	16
156.228	37.172	53.2013	15
145.555	3.55921	14.4306	14
129.723	63.6552	42.1387	13
118.366	26.4139	44.4733	12
117.87	35.7328	12.766	11
110.521	45.7202	43.6728	10
102.973	18.3713	58.8611	9
86.2511	9.05824	21.2689	8
85.9206	52.8039	1.27234	7
70.954	30.925	59.1297	6
54.7975	34.0251	3.11678	5
31.5658	35.9847	50.1465	4
18.8566	32.495	13.4675	3
11.2248	33.7757	51.3397	2
4.45638	39.2687	72.531	1
199.931	48.0747	59.6263	20
197.193	52.2599	25.6582	19
193.367	26.6591	35.9721	18
188.98	51.2537	55.8211	17
188.228	21.109	45.254	16
188.049	10.1305	61.7072	15
159.865	25.2312	57.0743	14
154.27	61.0398	53.8222	13
136.554	6.32177	18.0399	12
113.49	12.3471	37.2281	11
113.05	55.8949	7.6635	10
112.67	50.9295	9.6443	9
112.389	9.8847	15.6623	8
81.7462	25.6521	26.1387	7
72.2877	56.8361	13.8955	6
60.174	53.4568	65.3454	5
56.6935	31.0269	58.8005	4
54.0382	14.1539	41.2261	3
45.0389	34.2231	35.0321	2
40.5897	57.183	67.5397	1
184.137	17.9594	29.0791	20
183.439	21.887	9.35416	19
180.685	45.2274	2.4857	18
175.638	50.5957	41.0662	17
175.16	60.2917	11.9003	16
170	8.20762	73.163	15
136.795	28.5692	60.8395	14
134.913	48.9662	40.872	13
129.528	9.2403	3.52567	12
125.597	33.1346	41.1443	11
119.086	3.45974	41.0427	10
115.938	15.432	60.8859	9
92.432	27.9209	10.4215	8
81.2533	38.059	65.6003	7
63.3228	26.9562	15.7997	6
53.0863	50.9542	3.40069	5
50.6144	53.4481	6.96412	4
44.2034	2.73026	51.9974	3
34.3134	11.0049	21.3869	2
7.53605	63.2967	11.9162	1
194.165	44.2305	43.4271	20
176.599	15.6108	2.08856	19
176.27	62.0274	54.916	18
155.273	34.6838	11.6049	17
114.243	50.0759	60.6432	16
108.055	18.1888	31.218	15
103.027	20.1185	61.0823	14
101.229	0.204183	48.0528	13
90.3096	19.8594	35.7278	12
90.2777	9.49513	20.5867	11
84.0984	42.0734	25.3672	10
72.2511	13.9775	13.35	9
71.0117	25.8159	11.608	8
69.3354	30.3694	54.504	7
66.289	32.6033	38.0959	6
60.9208	2.83941	65.1668	5
59.1906	40.5675	72.5078	4
40.5674	48.5821	17.7701	3
8.989	3.47837	8.35594	2
0.729622	17.0627	74.3927	1
198.372	59.3208	31.4796	20
191.681	25.8626	0.724793	19
186.777	56.6143	1.06316	18
174.302	49.4888	54.935	17
169.078	60.5398	65.0344	16
156.228	37.172	53.2013	15
145.555	3.55921	14.4306	14
129.723	63.6552	42.1387	13
118.366	26.4139	44.4733	12
117.87	35.7328	12.766	11
110.521	45.7202	43.6728	10
102.973	18.3713	58.8611	9
86.2511	9.05824	21.2689	8
85.9206	52.8039	1.27234	7
70.954	30.925	59.1297	6
54.7975	34.0251	3.11678	5
31.5658	35.9847	50.1465	4
18.8566	32.495	13.4675	3
11.2248	33.7757	51.3397	2
4.45638	39.2687	72.531	1
199.931	48.0747	59.6263	20
197.193	52.2599	25.6582	19
193.367	26.6591	35.9721	18
188.98	51.2537	55.8211	17
188.228	21.109	45.254	16
188.049	10.1305	61.7072	15
159.865	25.2312	57.0743	14
154.27	61.0398	53.8222	13
136.554	6.32177	18.0399	12
113.49	12.3471	37.2281	11
113.05	55.8949	7.6635	10
112.67	50.9295	9.6443	9
112.389	9.8847	15.6623	8
81.7462	25.6521	26.1387	7
72.2877	56.8361	13.8955	6
60.174	53.4568	65.3454	5
56.6935	31.0269	58.8005	4
54.0382	14.1539	41.2261	3
45.0389	34.2231	35.0321	2
40.5897	57.183	67.5397	1
184.137	17.9594	29.0791	20
183.439	21.887	9.35416	19
180.685	45.2274	2.4857	18
175.638	50.5957	41.0662	17
175.16	60.2917	11.9003	16
170	8.20762	73.163	15
136.795	28.5692	60.8395	14
134.913	48.9662	40.872	13
129.528	9.2403	3.52567	12
125.597	33.1346	41.1443	11
119.086	3.45974	41.0427	10
115.938	15.432	60.8859	9
92.432	27.9209	10.4215	8
81.2533	38.059	65.6003	7
63.3228	26.9562	15.7997	6
53.0863	50.9542	3.40069	5
50.6144	53.4481	6.96412	4
44.2034	2.73026	51.9974	3
34.3134	11.0049	21.3869	2
7.53605	63.2967	11.9162	1
194.165	44.2305	43.4271	20
176.599	15.6108	2.08856	19
176.27	62.0274	54.916	18
155.273	34.6838	11.6049	17
114.243	50.0759	60.6432	16
108.055	18.1888	31.218	15
103.027	20.1185	61.0823	14
101.229	0.204183	48.0528	13
90.3096	19.8594	35.7278	12
90.2777	9.49513	20.5867	11
84.0984	42.0734	25.3672	10
72.2511	13.9775	13.35	9
71.0117	25.8159	11.608	8
69.3354	30.3694	54.504	7
66.289	32.6033	38.0959	6
60.9208	2.83941	65.1668	5
59.1906	40.5675	72.5078	4
40.5674	48.5821	17.7701	3
8.989	3.47837	8.35594	2
0.729622	17.0627	74.3927	1
198.372	59.3208	31.4796	20
191.681	25.8626	0.724793	19
186.777	56.6143	1.06316	18
174.302	49.4888	54.935	17
169.078	60.5398	65.0344	16
156.228	37.172	53.2013	15
145.555	3.55921	14.4306	14
129.723	63.6552	42.1387	13
118.366	26.4139	44.4733	12
117.87	35.7328	12.766	11
110.521	45.7202	43.6728	10
102.973	18.3713	58.8611	9
86.2511	9.05824	21.2689	8
85.9206	52.8039	1.27234	7
70.954	30.925	59.1297	6
54.7975	34.0251	3.11678	5
31.5658	35.9847	50.1465	4
18.8566	32.495	13.4675	3
11.2248	33.7757	51.3397	2
4.45638	39.2687	72.531	1
199.931	48.0747	59.6263	20
197.193	52.2599	25.6582	19
193.367	26.6591	35.9721	18
188.98	51.2537	55.8211	17
188.228	21.109	45.254	16
188.049	10.1305	61.7072	15
159.865	25.2312	57.0743	14
154.27	61.0398	53.8222	13
136.554	6.32177	18.0399	12
113.49	12.3471	37.2281	11
113.05	55.8949	7.6635	10
112.67	50.9295	9.6443	9
112.389	9.8847	15.6623	8
81.7462	25.6521	26.1387	7
72.2877	56.8361	13.8955	6
60.174	53.4568	65.3454	5
56.6935	31.0269	58.8005	4
54.0382	14.1539	41.2261	3
45.0389	34.2231	35.0321	2
40.5897	57.183	67.5397	1
184.137	17.9594	29.0791	20
183.439	21.887	9.35416	19
180.685	45.2274	2.4857	18
175.638	50.5957	41.0662	17
175.16	60.2917	11.9003	16
170	8.20762	73.163	15
136.795	28.5692	60.8395	14
134.913	48.9662	40.872	13
129.528	9.2403	3.52567	12
125.597	33.1346	41.1443	11
119.086	3.45974	41.0427	10
115.938	15.432	60.8859	9
92.432	27.9209	10.4215	8
81.2533	38.059	65.6003	7
63.3228	26.9562	15.7997	6
53.0863	50.9542	3.40069	5
50.6144	53.4481	6.96412	4
44.2034	2.73026	51.9974	3
34.3134	11.0049	21.3869	2
7.53605	63.2967	11.9162	1
194.165	44.2305	43.4271	20
176.599	15.6108	2.08856	19
176.27	62.0274	54.916	18
155.273	34.6838	11.6049	17
114.243	50.0759	60.6432	16
108.055	18.1888	31.218	15
103.027	20.1185	61.0823	14
101.229	0.204183	48.0528	13
90.3096	19.8594	35.7278	12
90.2777	9.49513	20.5867	11
84.0984	42.0734	25.3672	10
72.2511	13.9775	13.35	9
71.0117	25.8159	11.608	8
69.3354	30.3694	54.504	7
66.289	32.6033	38.0959	6
60.9208	2.83941	65.1668	5
59.1906	40.5675	72.5078	4
40.5674	48.5821	17.7701	3
8.989	3.47837	8.35594	2
0.729622	17.0627	74.3927	1
198.372	59.3208	31.4796	20
191.681	25.8626	0.724793	19
186.777	56.6143	1.06316	18
174.302	49.4888	54.935	17
169.078	60.5398	65.0344	16
156.228	37.172	53.2013	15
145.555	3.55921	14.4306	14
129.723	63.6552	42.1387	13
118.366	26.4139	44.4733	12
117.87	35.7328	12.766	11
110.521	45.7202	43.6728	10
102.973	18.3713	58.8611	9
86.2511	9.05824	21.2689	8
85.9206	52.8039	1.27234	7
70.954	30.925	59.1297	6
54.7975	34.0251	3.11678	5
31.5658	35.9847	50.1465	4
18.8566	32.495	13.4675	3
11.2248	33.7757	51.3397	2
4.45638	39.2687	72.531	1
199.931	48.0747	59.6263	20
197.193	52.2599	25.6582	19
193.367	26.6591	35.9721	18
188.98	51.2537	55.8211	17
188.228	21.109	45.254	16
188.049	10.1305	61.7072	15
159.865	25.2312	57.0743	14
154.27	61.0398	53.8222	13
136.554	6.32177	18.0399	12
113.49	12.3471	37.2281	11
113.05	55.8949	7.6635	10
112.67	50.9295	9.6443	9
112.389	9.8847	15.6623	8
81.7462	25.6521	26.1387	7
72.2877	56.8361	13.8955	6
60.174	53.4568	65.3454	5
56.6935	31.0269	58.8005	4
54.0382	14.1539	41.2261	3
45.0389	34.2231	35.0321	2
40.5897	57.183	67.5397	1
184.137	17.9594	29.0791	20
183.439	21.887	9.35416	19
180.685	45.2274	2.4857	18
175.638	50.5957	41.0662	17
175.16	60.2917	11.9003	16
170	8.20762	73.163	15
136.795	28.5692	60.8395	14
134.913	48.9662	40.872	13
129.528	9.2403	3.52567	12
125.597	33.1346	41.1443	11
119.086	3.45974	41.0427	10
115.938	15.432	60.8859	9
92.432	27.9209	10.4215	8
81.2533	38.059	65.6003	7
63.3228	26.9562	15.7997	6
53.0863	50.9542	3.40069	5
50.6144	53.4481	6.96412	4
44.2034	2.73026	51.9974	3
34.3134	11.0049	21.3869	2
7.53605	63.2967	11.9162	1
194.165	44.2305	43.4271	20
176.599	15.6108	2.08856	19
176.27	62.0274	54.916	18
155.273	34.6838	11.6049	17
114.243	50.0759	60.6432	16
108.055	18.1888	31.218	15
103.027	20.1185	61.0823	14
101.229	0.204183	48.0528	13
90.3096	19.8594	35.7278	12
90.2777	9.49513	20.5867	11
84.0984	42.0734	25.3672	10
72.2511	13.9775	13.35	9
71.0117	25.8159	11.608	8
69.3354	30.3694	54.504	7
66.289	32.6033	38.0959	6
60.9208	2.83941	65.1668	5
59.1906	40.5675	72.5078	4
40.5674	48.5821	17.7701	3
8.989	3.47837	8.35594	2
0.729622	17.0627	74.3927	1
198.372	59.3208	31.4796	20
191.681	25.8626	0.724793	19
186.777	56.6143	1.06316	18
174.302	49.4888	54.935	17
169.078	60.5398	65.0344	16
156.228	37.172	53.2013	15
145.555	3.55921	14.4306	14
129.723	63.6552	42.1387	13
118.366	26.4139	44.4733	12
117.87	35.7328	12.766	11
110.521	45.7202	43.6728	10
102.973	18.3713	58.8611	9
86.2511	9.05824	21.2689	8
85.9206	52.8039	1.27234	7
70.954	30.925	59.1297	6
54.7975	34.0251	3.11678	5
31.5658	35.9847	50.1465	4
18.8566	32.495	13.4675	3
11.2248	33.7757	51.3397	2
4.45638	39.2687	72.531	1
199.931	48.0747	59.6263	20
197.193	52.2599	25.6582	19
193.367	26.6591	35.9721	18
188.98	51.2537	55.8211	17
188.228	21.109	45.254	16
188.049	10.1305	61.7072	15
159.865	25.2312	57.0743	14
154.27	61.0398	53.8222	13
136.554	6.32177	18.0399	12
113.49	12.3471	37.2281	11
113.05	55.8949	7.6635	10
112.67	50.9295	9.6443	9
112.389	9.8847	15.6623	8
81.7462	25.6521	26.1387	7
72.2877	56.8361	13.8955	6
60.174	53.4568	65.3454	5
56.6935	31.0269	58.8005	4
54.0382	14.1539	41.2261	3
45.0389	34.2231	35.0321	2
40.5897	57.183	67.5397	1
184.137	17.9594	29.0791	20
183.439	21.887	9.35416	19
180.685	45.2274	2.4857	18
175.638	50.5957	41.0662	17
175.16	60.2917	11.9003	16
170	8.20762	73.163	15
136.795	28.5692	60.8395	14
134.913	48.9662	40.872	13
129.528	9.2403	3.52567	12
125.597	33.1346	41.1443	11
119.086	3.45974	41.0427	10
115.938	15.432	60.8859	9
92.432	27.9209	10.4215	8
81.2533	38.059	65.6003	7
63.3228	26.9562	15.7997	6
53.0863	50.9542	3.40069	5
50.6144	53.4481	6.96412	4
44.2034	2.73026	51.9974	3
34.3134	11.0049	21.3869	2
7.53605	63.2967	11.9162	1
194.165	44.2305	43.4271	20
176.599	15.6108	2.08856	19
176.27	62.0274	54.916	18
155.273	34.6838	11.6049	17
114.243	50.0759	60.6432	16
108.055	18.1888	31.218	15
103.027	20.1185	61.0823	14
101.229	0.204183	48.0528	13
90.3096	19.8594	35.7278	12
90.2777	9.49513	20.5867	11
84.0984	42.0734	25.3672	10
72.2511	13.9775	13.35	9
71.0117	25.8159	11.608	8
69.3354	30.3694	54.504	7
66.289	32.6033	38.0959	6
60.9208	2.83941	65.1668	5
59.1906	40.5675	72.5078	4
40.5674	48.5821	17.7701	3
8.989	3.47837	8.35594	2
0.729622	17.0627	74.3927	1
198.372	59.3208	31.4796	20
191.681	25.8626	0.724793	19
186.777	56.6143	1.06316	18
174.302	49.4888	54.935	17
169.078	60.5398	65.0344	16
156.228	37.172	53.2013	15
145.555	3.55921	14.4306	14
129.723	63.6552	42.1387	13
118.366	26.4139	44.4733	12
117.87	35.7328	12.766	11
110.521	45.7202	43.6728	10
102.973	18.3713	58.8611	9
86.2511	9.05824	21.2689	8
85.9206	52.8039	1.27234	7
70.954	30.925	59.1297	6
54.7975	34.0251	3.11678	5
31.5658	35.9847	50.1465	4
18.8566	32.495	13.4675	3
11.2248	33.7757	51.3397	2
4.45638	39.2687	72.531	1
199.931	48.0747	59.6263	20
197.193	52.2599	25.6582	19
193.367	26.6591	35.9721	18
188.98	51.2537	55.8211	17
188.228	21.109	45.254	16
188.049	10.1305	61.7072	15
159.865	25.2312	57.0743	14
154.27	61.0398	53.8222	13
136.554	6.32177	18.0399	12
113.49	12.3471	37.2281	11
113.05	55.8949	7.6635	10
112.67	50.9295	9.6443	9
112.389	9.8847	15.6623	8
81.7462	25.6521	26.1387	7
72.2877	56.8361	13.8955	6
60.174	53.4568	65.3454	5
56.6935	31.0269	58.8005	4
54.0382	14.1539	41.2261	3
45.0389	34.2231	35.0321	2
40.5897	57.183	67.5397	1
184.137	17.9594	29.0791	20
183.439	21.887	9.35416	19
180.685	45.2274	2.4857	18
175.638	50.5957	41.0662	17
175.16	60.2917	11.9003	16
170	8.20762	73.163	15
136.795	28.5692	60.8395	14
134.913	48.9662	40.872	13
129.528	9.2403	3.52567	12
125.597	33.1346	41.1443	11
119.086	3.45974	41.0427	10
115.938	15.432	60.8859	9
92.432	27.9209	10.4215	8
81.2533	38.059	65.6003	7
63.3228	26.9562	15.7997	6
53.0863	50.9542	3.40069	5
50.6144	53.4481	6.96412	4
44.2034	2.73026	51.9974	3
34.3134	11.0049	21.3869	2
7.53605	63.2967	11.9162	1
194.165	44.2305	43.4271	20
176.599	15.6108	2.08856	19
176.27	62.0274	54.916	18
155.273	34.6838	11.6049	17
114.243	50.0759	60.6432	16
108.055	18.1888	31.218	15
103.027	20.1185	61.0823	14
101.229	0.204183	48.0528	13
90.3096	19.8594	35.7278	12
90.2777	9.49513	20.5867	11
84.0984	42.0734	25.3672	10
72.2511	13.9775	13.35	9
71.0117	25.8159	11.608	8
69.3354	30.3694	54.504	7
66.289	32.6033	38.0959	6
60.9208	2.83941	65.1668	5
59.1906	40.5675	72.5078	4
40.5674	48.5821	17.7701	3
8.989	3.47837	8.35594	2
0.729622	17.0627	74.3927	1
198.372	59.3208	31.4796	20
191.681	25.8626	0.724793	19
186.777	56.6143	1.06316	18
174.302	49.4888	54.935	17
169.078	60.5398	65.0344	16
156.228	37.172	53.2013	15
145.555	3.55921	14.4306	14
129.723	63.6552	42.1387	13
118.366	26.4139	44.4733	12
117.87	35.7328	12.766	11
110.521	45.7202	43.6728	10
102.973	18.3713	58.8611	9
86.2511	9.05824	21.2689	8
85.9206	52.8039	1.27234	7
70.954	30.925	59.1297	6
54.7975	34.0251	3.11678	5
31.5658	35.9847	50.1465	4
18.8566	32.495	13.4675	3
11.2248	33.7757	51.3397	2
4.45638	39.2687	72.531	1
199.931	48.0747	59.6263	20
197.193	52.2599	25.6582	19
193.367	26.6591	35.9721	18
188.98	51.2537	55.8211	17
188.228	21.109	45.254	16
188.049	10.1305	61.7072	15
159.865	25.2312	57.0743	14
154.27	61.0398	53.8222	13
136.554	6.32177	18.0399	12
113.49	12.3471	37.2281	11
113.05	55.8949	7.6635	10
112.67	50.9295	9.6443	9
112.389	9.8847	15.6623	8
81.7462	25.6521	26.1387	7
72.2877	56.8361	13.8955	6
60.174	53.4568	65.3454	5
56.6935	31.0269	58.8005	4
54.0382	14.1539	41.2261	3
45.0389	34.2231	35.0321	2
40.5897	57.183	67.5397	1
184.137	17.9594	29.0791	20
183.439	21.887	9.35416	19
180.685	45.2274	2.4857	18
175.638	50.5957	41.0662	17
175.16	60.2917	11.9003	16
170	8.20762	73.163	15
136.795	28.5692	60.8395	14
134.913	48.9662	40.872	13
129.528	9.2403	3.52567	12
125.597	33.1346	41.1443	11
119.086	3.45974	41.0427	10
115.938	15.432	60.8859	9
92.432	27.9209	10.4215	8
81.2533	38.059	65.6003	7
63.3228	26.9562	15.7997	6
53.0863	50.9542	3.40069	5
50.6144	53.4481	6.96412	4
44.2034	2.73026	51.9974	3
34.3134	11.0049	21.3869	2
7.53605	63.2967	11.9162	1
194.165	44.2305	43.4271	20
176.599	15.6108	2.08856	19
176.27	62.0274	54.916	18
155.273	34.6838	11.6049	17
114.243	50.0759	60.6432	16
108.055	18.1888	31.218	15
103.027	20.1185	61.0823	14
101.229	0.204183	48.0528	13
90.3096	19.8594	35.7278	12
90.2777	9.49513	20.5867	11
84.0984	42.0734	25.3672	10
72.2511	13.9775	13.35	9
71.0117	25.8159	11.608	8
69.3354	30.3694	54.504	7
66.289	32.6033	38.0959	6
60.9208	2.83941	65.1668	5
59.1906	40.5675	72.5078	4
40.5674	48.5821	17.7701	3
8.989	3.47837	8.35594	2
0.729622	17.0627	74.3927	1
198.372	59.3208	31.4796	20
191.681	25.8626	0.724793	19
186.777	56.6143	1.06316	18
174.302	49.4888	54.935	17
169.078	60.5398	65.0344	16
156.228	37.172	53.2013	15
145.555	3.55921	14.4306	14
129.723	63.6552	42.1387	13
118.366	26.4139	44.4733	12
117.87	35.7328	12.766	11
110.521	45.7202	43.6728	10
102.973	18.3713	58.8611	9
86.2511	9.05824	21.2689	8
85.9206	52.8039	1.27234	7
70.954	30.925	59.1297	6
54.7975	34.0251	3.11678	5
31.5658	35.9847	50.1465	4
18.8566	32.495	13.4675	3
11.2248	33.7757	51.3397	2
4.45638	39.2687	72.531	1
199.931	48.0747	59.6263	20
197.193	52.2599	25.6582	19
193.367	26.6591	35.9721	18
188.98	51.2537	55.8211	17
188.228	21.109	45.254	16
188.049	10.1305	61.7072	15
159.865	25.2312	57.0743	14
154.27	61.0398	53.8222	13
136.554	6.32177	18.0399	12
113.49	12.3471	37.2281	11
113.05	55.8949	7.6635	10
112.67	50.9295	9.6443	9
112.389	9.8847	15.6623	8
81.7462	25.6521	26.1387	7
72.2877	56.8361	13.8955	6
60.174	53.4568	65.3454	5
56.6935	31.0269	58.8005	4
54.0382	14.1539	41.2261	3
45.0389	34.2231	35.0321	2
40.5897	57.183	67.5397	1
184.137	17.9594	29.0791	20
183.439	21.887	9.35416	19
180.685	45.2274	2.4857	18
175.638	50.5957	41.0662	17
175.16	60.2917	11.9003	16
170	8.20762	73.163	15
136.795	28.5692	60.8395	14
134.913	48.9662	40.872	13
129.528	9.2403	3.52567	12
125.597	33.1346	41.1443	11
119.086	3.45974	41.0427	10
115.938	15.432	60.8859	9
92.432	27.9209	10.4215	8
81.2533	38.059	65.6003	7
63.3228	26.9562	15.7997	6
53.0863	50.9542	3.40069	5
50.6144	53.4481	6.96412	4
44.2034	2.73026	51.9974	3
34.3134	11.0049	21.3869	2
7.53605	63.2967	11.9162	1
194.165	44.2305	43.4271	20
176.599	15.6108	2.08856	19
176.27	62.0274	54.916	18
155.273	34.6838	11.6049	17
114.243	50.0759	60.6432	16
108.055	18.1888	31.218	15
103.027	20.1185	61.0823	14
101.229	0.204183	48.0528	13
90.3096	19.8594	35.7278	12
90.2777	9.49513	20.5867	11
84.0984	42.0734	25.3672	10
72.2511	13.9775	13.35	9
71.0117	25.8159	11.608	8
69.3354	30.3694	54.504	7
66.289	32.6033	38.0959	6
60.9208	2.83941	65.1668	5
59.1906	40.5675	72.5078	4
40.5674	48.5821	17.7701	3
8.989	3.47837	8.35594	2
0.729622	17.0627	74.3927	1
198.372	59.3208	31.4796	20
191.681	25.8626	0.724793	19
186.777	56.6143	1.06316	18
174.302	49.4888	54.935	17
169.078	60.5398	65.0344	16
156.228	37.172	53.2013	15
145.555	3.55921	14.4306	14
129.723	63.6552	42.1387	13
118.366	26.4139	44.4733	12
117.87	35.7328	12.766	11
110.521	45.7202	43.6728	10
102.973	18.3713	58.8611	9
86.2511	9.05824	21.2689	8
85.9206	52.8039	1.27234	7
70.954	30.925	59.1297	6
54.7975	34.0251	3.11678	5
31.5658	35.9847	50.1465	4
18.8566	32.495	13.4675	3
11.2248	33.7757	51.3397	2
4.45638	39.2687	72.531	1
199.931	48.0747	59.6263	20
197.193	52.2599	25.6582	19
193.367	26.6591	35.9721	18
188.98	51.2537	55.8211	17
188.228	21.109	45.254	16
188.049	10.1305	61.7072	15
159.865	25.2312	57.0743	14
154.27	61.0398	53.8222	13
136.554	6.32177	18.0399	12
113.49	12.3471	37.2281	11
113.05	55.8949	7.6635	10
112.67	50.9295	9.6443	9
112.389	9.8847	15.6623	8
81.7462	25.6521	26.1387	7
72.2877	56.8361	13.8955	6
60.174	53.4568	65.3454	5
56.6935	31.0269	58.8005	4
54.0382	14.1539	41.2261	3
45.0389	34.2231	35.0321	2
40.5897	57.183	67.5397	1
184.137	17.9594	29.0791	20
183.439	21.887	9.35416	19
180.685	45.2274	2.4857	18
175.638	50.5957	41.0662	17
175.16	60.2917	11.9003	16
170	8.20762	73.163	15
136.795	28.5692	60.8395	14
134.913	48.9662	40.872	13
129.528	9.2403	3.52567	12
125.597	33.1346	41.1443	11
119.086	3.45974	41.0427	10
115.938	15.432	60.8859	9
92.432	27.9209	10.4215	8
81.2533	38.059	65.6003	7
63.3228	26.9562	15.7997	6
53.0863	50.9542	3.40069	5
50.6144	53.4481	6.96412	4
44.2034	2.73026	51.9974	3
34.3134	11.0049	21.3869	2
7.53605	63.2967	11.9162	1
194.165	44.2305	43.4271	20
176.599	15.6108	2.08856	19
176.27	62.0274	54.916	18
155.273	34.6838	11.6049	17
114.243	50.0759	60.6432	16
108.055	18.1888	31.218	15
103.027	20.1185	61.0823	14
101.229	0.204183	48.0528	13
90.3096	19.8594	35.7278	12
90.2777	9.49513	20.5867	11
84.0984	42.0734	25.3672	10
72.2511	13.9775	13.35	9
71.0117	25.8159	11.608	8
69.3354	30.3694	54.504	7
66.289	32.6033	38.0959	6
60.9208	2.83941	65.1668	5
59.1906	40.5675	72.5078	4
40.5674	48.5821	17.7701	3
8.989	3.47837	8.35594	2
0.729622	17.0627	74.3927	1
198.372	59.3208	31.4796	20
191.681	25.8626	0.724793	19
186.777	56.6143	1.06316	18
174.302	49.4888	54.935	17
169.078	60.5398	65.0344	16
156.228	37.172	53.2013	15
145.555	3.55921	14.4306	14
129.723	63.6552	42.1387	13
118.366	26.4139	44.4733	12
117.87	35.7328	12.766	11
110.521	45.7202	43.6728	10
102.973	18.3713	58.8611	9
86.2511	9.05824	21.2689	8
85.9206	52.8039	1.27234	7
70.954	30.925	59.1297	6
54.7975	34.0251	3.11678	5
31.5658	35.9847	50.1465	4
18.8566	32.495	13.4675	3
11.2248	33.7757	51.3397	2
4.45638	39.2687	72.531	1
199.931	48.0747	59.6263	20
197.193	52.2599	25.6582	19
193.367	26.6591	35.9721	18
188.98	51.2537	55.8211	17
188.228	21.109	45.254	16
188.049	10.1305	61.7072	15
159.865	25.2312	57.0743	14
154.27	61.0398	53.8222	13
136.554	6.32177	18.0399	12
113.49	12.3471	37.2281	11
113.05	55.8949	7.6635	10
112.67	50.9295	9.6443	9
112.389	9.8847	15.6623	8
81.7462	25.6521	26.1387	7
72.2877	56.8361	13.8955	6
60.174	53.4568	65.3454	5
56.6935	31.0269	58.8005	4
54.0382	14.1539	41.2261	3
45.0389	34.2231	35.0321	2
40.5897	57.183	67.5397	1
184.137	17.9594	29.0791	20
183.439	21.887	9.35416	19
180.685	45.2274	2.4857	18
175.638	50.5957	41.0662	17
175.16	60.2917	11.9003	16
170	8.20762	73.163	15
136.795	28.5692	60.8395	14
134.913	48.9662	40.872	13
129.528	9.2403	3.52567	12
125.597	33.1346	41.1443	11
119.086	3.45974	41.0427	10
115.938	15.432	60.8859	9
92.432	27.9209	10.4215	8
81.2533	38.059	65.6003	7
63.3228	26.9562	15.7997	6
53.0863	50.9542	3.40069	5
50.6144	53.4481	6.96412	4
44.2034	2.73026	51.9974	3
34.3134	11.0049	21.3869	2
7.53605	63.2967	11.9162	1
194.165	44.2305	43.4271	20
176.599	15.6108	2.08856	19
176.27	62.0274	54.916	18
155.273	34.6838	11.6049	17
114.243	50.0759	60.6432	16
108.055	18.1888	31.218	15
103.027	20.1185	61.0823	14
101.229	0.204183	48.0528	13
90.3096	19.8594	35.7278	12
90.2777	9.49513	20.5867	11
84.0984	42.0734	25.3672	10
72.2511	13.9775	13.35	9
71.0117	25.8159	11.608	8
69.3354	30.3694	54.504	7
66.289	32.6033	38.0959	6
60.9208	2.83941	65.1668	5
59.1906	40.5675	72.5078	4
40.5674	48.5821	17.7701	3
8.989	3.47837	8.35594	2
0.729622	17.0627	74.3927	1
198.372	59.3208	31.4796	20
191.681	25.8626	0.724793	19
186.777	56.6143	1.06316	18
174.302	49.4888	54.935	17
169.078	60.5398	65.0344	16
156.228	37.172	53.2013	15
145.555	3.55921	14.4306	14
129.723	63.6552	42.1387	13
118.366	26.4139	44.4733	12
117.87	35.7328	12.766	11
110.521	45.7202	43.6728	10
102.973	18.3713	58.8611	9
86.2511	9.05824	21.2689	8
85.9206	52.8039	1.27234	7
70.954	30.925	59.1297	6
54.7975	34.0251	3.11678	5
31.5658	35.9847	50.1465	4
18.8566	32.495	13.4675	3
11.2248	33.7757	51.3397	2
4.45638	39.2687	72.531	1
199.931	48.0747	59.6263	20
197.193	52.2599	25.6582	19
193.367	26.6591	35.9721	18
188.98	51.2537	55.8211	17
188.228	21.109	45.254	16
188.049	10.1305	61.7072	15
159.865	25.2312	57.0743	14
154.27	61.0398	53.8222	13
136.554	6.32177	18.0399	12
113.49	12.3471	37.2281	11
113.05	55.8949	7.6635	10
112.67	50.9295	9.6443	9
112.389	9.8847	15.6623	8
81.7462	25.6521	26.1387	7
72.2877	56.8361	13.8955	6
60.174	53.4568	65.3454	5
56.6935	31.0269	58.8005	4
54.0382	14.1539	41.2261	3
45.0389	34.2231	35.0321	2
40.5897	57.183	67.5397	1
184.137	17.9594	29.0791	20
183.439	21.887	9.35416	19
180.685	45.2274	2.4857	18
175.638	50.5957	41.0662	17
175.16	60.2917	11.9003	16
170	8.20762	73.163	15
136.795	28.5692	60.8395	14
134.913	48.9662	40.872	13
129.528	9.2403	3.52567	12
125.597	33.1346	41.1443	11
119.086	3.45974	41.0427	10
115.938	15.432	60.8859	9
92.432	27.9209	10.4215	8
81.2533	38.059	65.6003	7
63.3228	26.9562	15.7997	6
53.0863	50.9542	3.40069	5
50.6144	53.4481	6.96412	4
44.2034	2.73026	51.9974	3
34.3134	11.0049	21.3869	2
7.53605	63.2967	11.9162	1
194.165	44.2305	43.4271	20
176.599	15.6108	2.08856	19
176.27	62.0274	54.916	18
155.273	34.6838	11.6049	17
114.243	50.0759	60.6432	16
108.055	18.1888	31.218	15
103.027	20.1185	61.0823	14
101.229	0.204183	48.0528	13
90.3096	19.8594	35.7278	12
90.2777	9.49513	20.5867	11
84.0984	42.0734	25.3672	10
72.2511	13.9775	13.35	9
71.0117	25.8159	11.608	8
69.3354	30.3694	54.504	7
66.289	32.6033	38.0959	6
60.9208	2.83941	65.1668	5
59.1906	40.5675	72.5078	4
40.5674	48.5821	17.7701	3
8.989	3.47837	8.35594	2
0.729622	17.0627	74.3927	1
198.372	59.3208	31.4796	20
191.681	25.8626	0.724793	19
186.777	56.6143	1.06316	18
174.302	49.4888	54.935	17
169.078	60.5398	65.0344	16
156.228	37.172	53.2013	15
145.555	3.55921	14.4306	14
129.723	63.6552	42.1387	13
118.366	26.4139	44.4733	12
117.87	35.7328	12.766	11
110.521	45.7202	43.6728	10
102.973	18.3713	58.8611	9
86.2511	9.05824	21.2689	8
85.9206	52.8039	1.27234	7
70.954	30.925	59.1297	6
54.7975	34.0251	3.11678	5
31.5658	35.9847	50.1465	4
18.8566	32.495	13.4675	3
11.2248	33.7757	51.3397	2
4.45638	39.2687	72.531	1
199.931	48.0747	59.6263	20
197.193	52.2599	25.6582	19
193.367	26.6591	35.9721	18
188.98	51.2537	55.8211	17
188.228	21.109	45.254	16
188.049	10.1305	61.7072	15
159.865	25.2312	57.0743	14
154.27	61.0398	53.8222	13
136.554	6.32177	18.0399	12
113.49	12.3471	37.2281	11
113.05	55.8949	7.6635	10
112.67	50.9295	9.6443	9
112.389	9.8847	15.6623	8
81.7462	25.6521	26.1387	7
72.2877	56.8361	13.8955	6
60.174	53.4568	65.3454	5
56.6935	31.0269	58.8005	4
54.0382	14.1539	41.2261	3
45.0389	34.2231	35.0321	2
40.5897	57.183	67.5397	1
184.137	17.9594	29.0791	20
183.439	21.887	9.35416	19
180.685	45.2274	2.4857	18
175.638	50.5957	41.0662	17
175.16	60.2917	11.9003	16
170	8.20762	73.163	15
136.795	28.5692	60.8395	14
134.913	48.9662	40.872	13
129.528	9.2403	3.52567	12
125.597	33.1346	41.1443	11
119.086	3.45974	41.0427	10
115.938	15.432	60.8859	9
92.432	27.9209	10.4215	8
81.2533	38.059	65.6003	7
63.3228	26.9562	15.7997	6
53.0863	50.9542	3.40069	5
50.6144	53.4481	6.96412	4
44.2034	2.73026	51.9974	3
34.3134	11.0049	21.3869	2
7.53605	63.2967	11.9162	1
194.165	44.2305	43.4271	20
176.599	15.6108	2.08856	19
176.27	62.0274	54.916	18
155.273	34.6838	11.6049	17
114.243	50.0759	60.6432	16
108.055	18.1888	31.218	15
103.027	20.1185	61.0823	14
101.229	0.204183	48.0528	13
90.3096	19.8594	35.7278	12
90.2777	9.49513	20.5867	11
84.0984	42.0734	25.3672	10
72.2511	13.9775	13.35	9
71.0117	25.8159	11.608	8
69.3354	30.3694	54.504	7
66.289	32.6033	38.0959	6
60.9208	2.83941	65.1668	5
59.1906	40.5675	72.5078	4
40.5674	48.5821	17.7701	3
8.989	3.47837	8.35594	2
0.729622	17.0627	74.3927	1
198.372	59.3208	31.4796	20
191.681	25.8626	0.724793	19
186.777	56.6143	1.06316	18
174.302	49.4888	54.935	17
169.078	60.5398	65.0344	16
156.228	37.172	53.2013	15
145.555	3.55921	14.4306	14
129.723	63.6552	42.1387	13
118.366	26.4139	44.4733	12
117.87	35.7328	12.766	11
110.521	45.7202	43.6728	10
102.973	18.3713	58.8611	9
86.2511	9.05824	21.2689	8
85.9206	52.8039	1.27234	7
70.954	30.925	59.1297	6
54.7975	34.0251	3.11678	5
31.5658	35.9847	50.1465	4
18.8566	32.495	13.4675	3
11.2248	33.7757	51.3397	2
4.45638	39.2687	72.531	1
199.931	48.0747	59.6263	20
197.193	52.2599	25.6582	19
193.367	26.6591	35.9721	18
188.98	51.2537	55.8211	17
188.228	21.109	45.254	16
188.049	10.1305	61.7072	15
159.865	25.2312	57.0743	14
154.27	61.0398	53.8222	13
136.554	6.32177	18.0399	12
113.49	12.3471	37.2281	11
113.05	55.8949	7.6635	10
112.67	50.9295	9.6443	9
112.389	9.8847	15.6623	8
81.7462	25.6521	26.1387	7
72.2877	56.8361	13.8955	6
60.174	53.4568	65.3454	5
56.6935	31.0269	58.8005	4
54.0382	14.1539	41.2261	3
45.0389	34.2231	35.0321	2
40.5897	57.183	67.5397	1
184.137	17.9594	29.0791	20
183.439	21.887	9.35416	19
180.685	45.2274	2.4857	18
175.638	50.5957	41.0662	17
175.16	60.2917	11.9003	16
170	8.20762	73.163	15
136.795	28.5692	60.8395	14
134.913	48.9662	40.872	13
129.528	9.2403	3.52567	12
125.597	33.1346	41.1443	11
119.086	3.45974	41.0427	10
115.938	15.432	60.8859	9
92.432	27.9209	10.4215	8
81.2533	38.059	65.6003	7
63.3228	26.9562	15.7997	6
53.0863	50.9542	3.40069	5
50.6144	53.4481	6.96412	4
44.2034	2.73026	51.9974	3
34.3134	11.0049	21.3869	2
7.53605	63.2967	11.9162	1
194.165	44.2305	43.4271	20
176.599	15.6108	2.08856	19
176.27	62.0274	54.916	18
155.273	34.6838	11.6049	17
114.243	50.0759	60.6432	16
108.055	18.1888	31.218	15
103.027	20.1185	61.0823	14
101.229	0.204183	48.0528	13
90.3096	19.8594	35.7278	12
90.2777	9.49513	20.5867	11
84.0984	42.0734	25.3672	10
72.2511	13.9775	13.35	9
71.0117	25.8159	11.608	8
69.3354	30.3694	54.504	7
66.289	32.6033	38.0959	6
60.9208	2.83941	65.1668	5
59.1906	40.5675	72.5078	4
40.5674	48.5821	17.7701	3
8.989	3.47837	8.35594	2
0.729622	17.0627	74.3927	1
198.372	59.3208	31.4796	20
191.681	25.8626	0.724793	19
186.777	56.6143	1.06316	18
174.302	49.4888	54.935	17
169.078	60.5398	65.0344	16
156.228	37.172	53.2013	15
145.555	3.55921	14.4306	14
129.723	63.6552	42.1387	13
118.366	26.4139	44.4733	12
117.87	35.7328	12.766	11
110.521	45.7202	43.6728	10
102.973	18.3713	58.8611	9
86.2511	9.05824	21.2689	8
85.9206	52.8039	1.27234	7
70.954	30.925	59.1297	6
54.7975	34.0251	3.11678	5
31.5658	35.9847	50.1465	4
18.8566	32.495	13.4675	3
11.2248	33.7757	51.3397	2
4.45638	39.2687	72.531	1
199.931	48.0747	59.6263	20
197.193	52.2599	25.6582	19
193.367	26.6591	35.9721	18
188.98	51.2537	55.8211	17
188.228	21.109	45.254	16
188.049	10.1305	61.7072	15
159.865	25.2312	57.0743	14
154.27	61.0398	53.8222	13
136.554	6.32177	18.0399	12
113.49	12.3471	37.2281	11
113.05	55.8949	7.6635	10
112.67	50.9295	9.6443	9
112.389	9.8847	15.6623	8
81.7462	25.6521	26.1387	7
72.2877	56.8361	13.8955	6
60.174	53.4568	65.3454	5
56.6935	31.0269	58.8005	4
54.0382	14.1539	41.2261	3
45.0389	34.2231	35.0321	2
40.5897	57.183	67.5397	1
184.137	17.9594	29.0791	20
183.439	21.887	9.35416	19
180.685	45.2274	2.4857	18
175.638	50.5957	41.0662	17
175.16	60.2917	11.9003	16
170	8.20762	73.163	15
136.795	28.5692	60.8395	14
134.913	48.9662	40.872	13
129.528	9.2403	3.52567	12
125.597	33.1346	41.1443	11
119.086	3.45974	41.0427	10
115.938	15.432	60.8859	9
92.432	27.9209	10.4215	8
81.2533	38.059	65.6003	7
63.3228	26.9562	15.7997	6
53.0863	50.9542	3.40069	5
50.6144	53.4481	6.96412	4
44.2034	2.73026	51.9974	3
34.3134	11.0049	21.3869	2
7.53605	63.2967	11.9162	1
194.165	44.2305	43.4271	20
176.599	15.6108	2.08856	19
176.27	62.0274	54.916	18
155.273	34.6838	11.6049	17
114.243	50.0759	60.6432	16
108.055	18.1888	31.218	15
103.027	20.1185	61.0823	14
101.229	0.204183	48.0528	13
90.3096	19.8594	35.7278	12
90.2777	9.49513	20.5867	11
84.0984	42.0734	25.3672	10
72.2511	13.9775	13.35	9
71.0117	25.8159	11.608	8
69.3354	30.3694	54.504	7
66.289	32.6033	38.0959	6
60.9208	2.83941	65.1668	5
59.1906	40.5675	72.5078	4
40.5674	48.5821	17.7701	3
8.989	3.47837	8.35594	2
0.729622	17.0627	74.3927	1
198.372	59.3208	31.4796	20
191.681	25.8626	0.724793	19
186.777	56.6143	1.06316	18
174.302	49.4888	54.935	17
169.078	60.5398	65.0344	16
156.228	37.172	53.2013	15
145.555	3.55921	14.4306	14
129.723	63.6552	42.1387	13
118.366	26.4139	44.4733	12
117.87	35.7328	12.766	11
110.521	45.7202	43.6728	10
102.973	18.3713	58.8611	9
86.2511	9.05824	21.2689	8
85.9206	52.8039	1.27234	7
70.954	30.925	59.1297	6
54.7975	34.0251	3.11678	5
31.5658	35.9847	50.1465	4
18.8566	32.495	13.4675	3
11.2248	33.7757	51.3397	2
4.45638	39.2687	72.531	1
199.931	48.0747	59.6263	20
197.193	52.2599	25.6582	19
193.367	26.6591	35.9721	18
188.98	51.2537	55.8211	17
188.228	21.109	45.254	16
188.049	10.1305	61.7072	15
159.865	25.2312	57.0743	14
154.27	61.0398	53.8222	13
136.554	6.32177	18.0399	12
113.49	12.3471	37.2281	11
113.05	55.8949	7.6635	10
112.67	50.9295	9.6443	9
112.389	9.8847	15.6623	8
81.7462	25.6521	26.1387	7
72.2877	56.8361	13.8955	6
60.174	53.4568	65.3454	5
56.6935	31.0269	58.8005	4
54.0382	14.1539	41.2261	3
45.0389	34.2231	35.0321	2
40.5897	57.183	67.5397	1
184.137	17.9594	29.0791	20
183.439	21.887	9.35416	19
180.685	45.2274	2.4857	18
175.638	50.5957	41.0662	17
175.16	60.2917	11.9003	16
170	8.20762	73.163	15
136.795	28.5692	60.8395	14
134.913	48.9662	40.872	13
129.528	9.2403	3.52567	12
125.597	33.1346	41.1443	11
119.086	3.45974	41.0427	10
115.938	15.432	60.8859	9
92.432	27.9209	10.4215	8
81.2533	38.059	65.6003	7
63.3228	26.9562	15.7997	6
53.0863	50.9542	3.40069	5
50.6144	53.4481	6.96412	4
44.2034	2.73026	51.9974	3
34.3134	11.0049	21.3869	2
7.53605	63.2967	11.9162	1
[truncated: 400 more rows]
